# Supplementary material for: Salivary miRNA Profiles in COVID-19 Patients with Different Disease Severities
Source: MDPI journal article supplement (doi:10.3390/ijms241310992), 2023-07-01
Supplement: s1 [file s1]

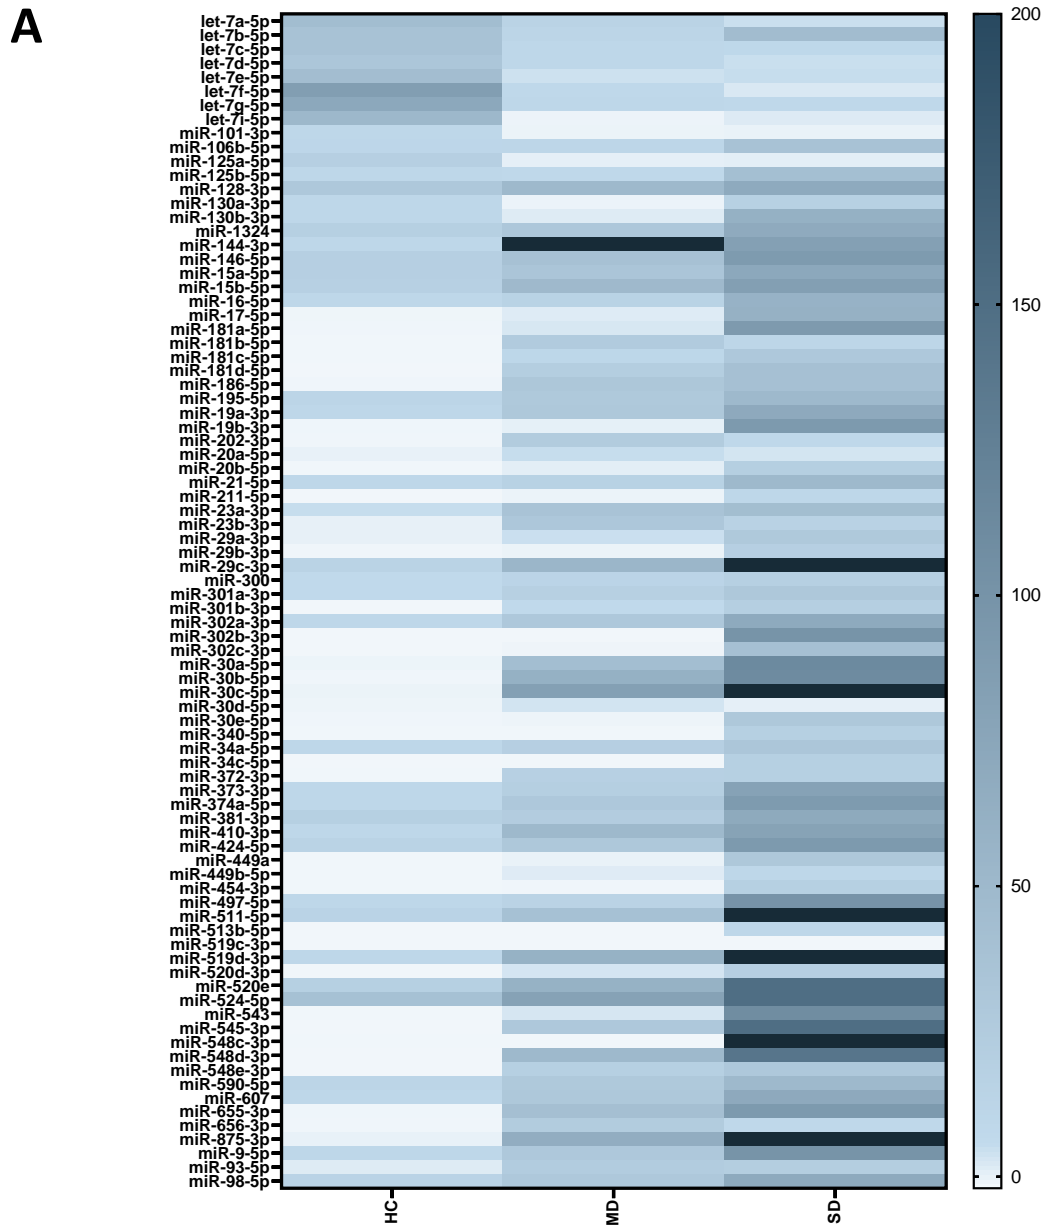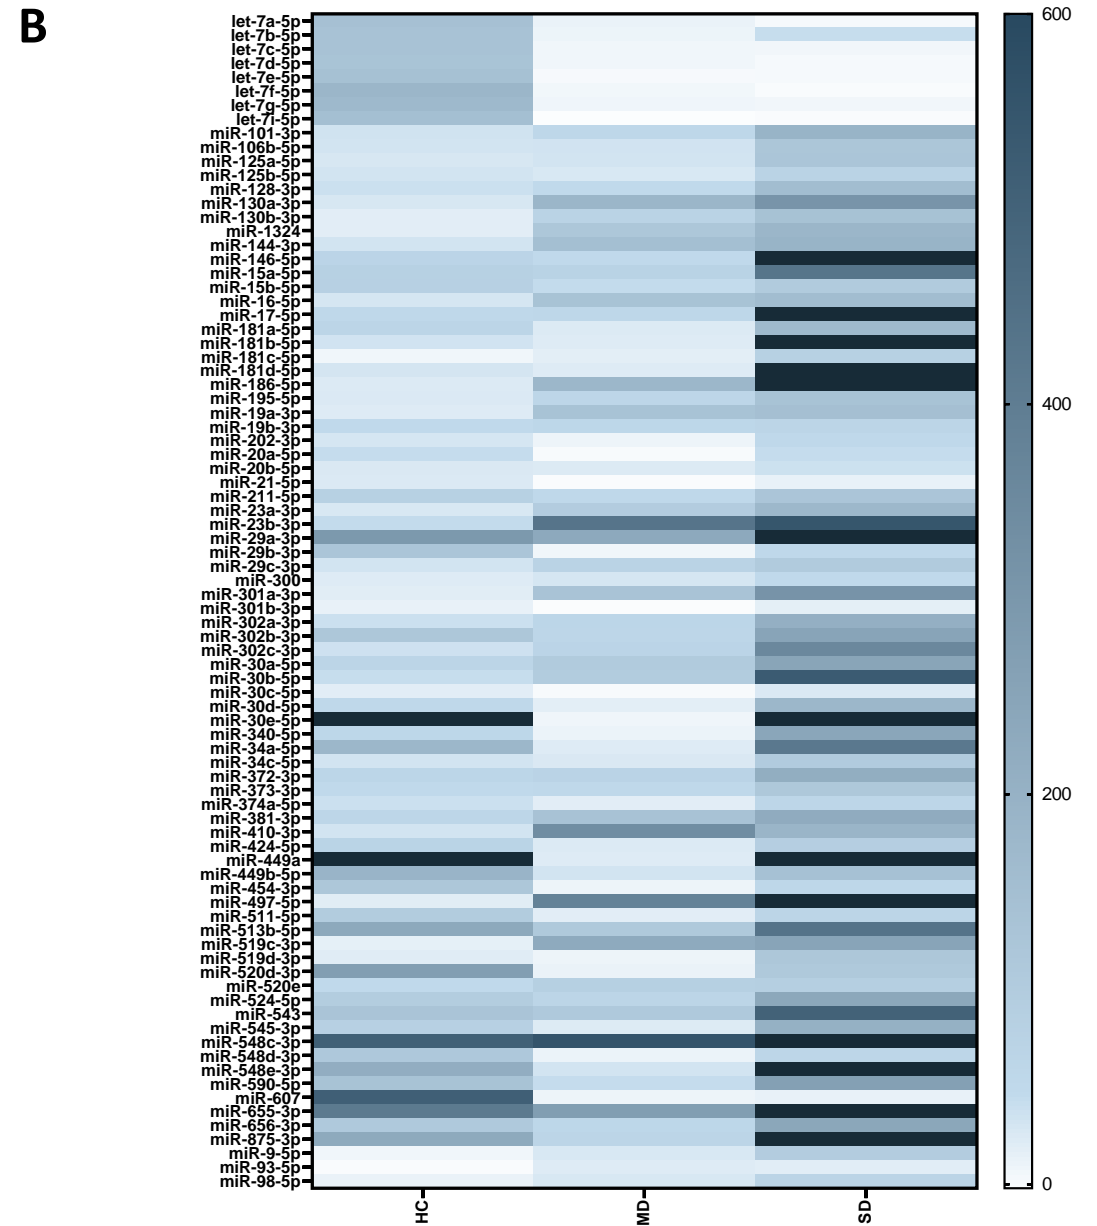

**Figure S1. miRNA profile of HC, MD and SD in saliva (A) and plasma (B) samples. miRNA expression (mean values) is shown as a color scale from light blue to blue (Heatmap). Cytokines/chemokines production (mean values) is shown as a color scale from white to blue (Heatmap)**
